# Supplementary material
Source: PubMed Central journal article supplement (PMC5034895)
Supplement: NIHMS69965-supplement-Supporting_Information.pdf [file NIHMS69965-supplement-Supporting_Information.pdf]

# Enhanced extraction of bovine serum albumin with aqueous biphasic systems of phosphonium- and ammonium-based ionic liquids

Matheus M. Pereira<sup>1</sup>, Sónia N. Pedro<sup>1</sup>, Maria V. Quental<sup>1</sup>, Álvaro S. Lima<sup>2</sup>, João A. P. Coutinho<sup>1</sup> and Mara G. Freire<sup>1\*</sup>

<sup>1</sup>CICECO-Aveiro Institute of Materials, Department of Chemistry, University of Aveiro, 3810-193 Aveiro, Portugal

<sup>2</sup>Programa de Pós-Graduação em Engenharia de Processos, Universidade Tiradentes, Farolândia, CEP 49032-490 Aracaju, SE, Brazil

\*Corresponding author

Tel: +351-234401422; Fax: +351-234-370084; E-mail address: maragfreire@ua.pt

## Supporting Information

**Table S1**

Experimental weight fraction data for the systems composed of IL (1) +  $C_6H_5K_3O_7/C_6H_8O_7$  (2) +  $H_2O$  (3) at 25°C.

| [P <sub>4444</sub> ]Br |                    | [P <sub>4441</sub> ][MeSO <sub>4</sub> ] |                    | [P <sub>i(444)1</sub> ][Tos] |                    |
|------------------------|--------------------|------------------------------------------|--------------------|------------------------------|--------------------|
| 100 w <sub>1</sub>     | 100 w <sub>1</sub> | 100 w <sub>2</sub>                       | 100 w <sub>2</sub> | 100 w <sub>1</sub>           | 100 w <sub>2</sub> |
| 47.8388                | 0.4370             | 56.6986                                  | 1.3192             | 75.0208                      | 4.9219             |
| 43.1597                | 0.6590             | 47.4375                                  | 2.9804             | 59.0400                      | 8.4023             |
| 40.1121                | 0.8976             | 41.1468                                  | 4.2037             | 51.2389                      | 11.3257            |
| 38.1240                | 1.0659             | 38.3272                                  | 5.4815             | 46.1956                      | 12.6033            |
| 36.3785                | 1.1897             | 35.7905                                  | 6.0568             | 44.0170                      | 13.6880            |
| 33.5144                | 1.6411             | 31.0666                                  | 7.5380             | 39.8392                      | 15.9586            |
| 30.2567                | 2.1531             | 29.4275                                  | 8.1733             | 35.8389                      | 16.3896            |
| 19.2260                | 5.1635             | 28.1825                                  | 9.0201             | 33.8655                      | 17.9247            |
| 9.5022                 | 15.0050            | 26.9444                                  | 9.6570             | 32.6041                      | 18.6099            |
| 5.7890                 | 23.2343            | 25.5742                                  | 9.9455             | 32.0466                      | 18.9232            |
| 5.2514                 | 26.3552            | 23.9893                                  | 11.2778            | 30.9711                      | 19.3291            |
| 4.6391                 | 26.5561            | 23.0484                                  | 11.7249            | 29.5810                      | 20.2982            |
| 3.9429                 | 28.3602            | 22.4124                                  | 12.0319            | 28.3531                      | 20.4044            |
| 3.2088                 | 29.3497            | 21.2283                                  | 12.9313            | 26.3549                      | 21.7354            |
| 3.0881                 | 31.0576            | 20.5209                                  | 13.3704            | 25.6420                      | 21.9617            |
| 2.0531                 | 40.2288            | 19.9960                                  | 13.9119            | 24.9033                      | 22.2586            |
| 1.6293                 | 42.9543            | 19.3293                                  | 14.1657            | 24.0632                      | 23.0090            |
| 1.4306                 | 43.0913            | 18.5344                                  | 14.8994            | 23.4145                      | 23.2715            |
| 1.1906                 | 43.9595            | 18.0235                                  | 15.1199            | 22.5863                      | 24.0136            |
|                        |                    | 17.2124                                  | 15.9367            | 20.8279                      | 24.6423            |
|                        |                    | 16.7184                                  | 16.2356            | 20.3996                      | 24.8575            |
|                        |                    | 16.0916                                  | 16.7175            | 19.9438                      | 25.0807            |
|                        |                    | 15.6444                                  | 17.0013            | 19.5664                      | 25.3059            |
|                        |                    | 15.2076                                  | 17.3501            | 18.9791                      | 25.8348            |

|         |         |         |         |
|---------|---------|---------|---------|
| 14.6634 | 17.8620 | 18.5981 | 26.0797 |
| 14.4839 | 17.6352 | 18.2917 | 26.1410 |
| 13.7880 | 18.6043 | 17.9134 | 26.3303 |
| 13.2213 | 18.8075 | 17.6349 | 26.4507 |
| 12.7655 | 19.2995 | 17.2022 | 26.8071 |
| 12.2857 | 19.7923 | 16.7512 | 27.1170 |
| 12.2565 | 19.1829 | 16.4947 | 27.2218 |
| 11.4734 | 19.0956 | 16.2380 | 27.2667 |
| 10.8963 | 19.6156 | 15.6235 | 27.8635 |
| 10.4880 | 19.6969 | 15.4141 | 28.0551 |
| 9.9797  | 20.5787 | 15.2192 | 28.0490 |
| 9.7096  | 20.9184 | 14.9494 | 28.4711 |
| 9.2204  | 21.5358 | 14.6383 | 28.7265 |
| 8.8098  | 21.9017 | 14.3991 | 29.0902 |
| 8.4510  | 22.3908 | 14.1926 | 29.1553 |
| 8.0010  | 23.2081 | 13.9835 | 29.1822 |
|         |         | 13.6886 | 29.4696 |
|         |         | 13.4918 | 29.5053 |
|         |         | 12.9818 | 29.9173 |
|         |         | 12.7009 | 30.1312 |
|         |         | 12.5818 | 30.1172 |
|         |         | 12.4371 | 30.1693 |
|         |         | 12.3459 | 30.0383 |
|         |         | 12.2228 | 30.2212 |
|         |         | 12.0441 | 30.4163 |
|         |         | 11.5321 | 31.1580 |
|         |         | 11.2065 | 31.1134 |

|         |         |
|---------|---------|
| 10.9317 | 31.1274 |
| 10.6328 | 31.4308 |
| 10.3840 | 31.6882 |
| 10.1343 | 31.8178 |
| 9.8418  | 31.9182 |
| 9.4906  | 32.2824 |
| 9.0729  | 33.1904 |
| 8.8289  | 33.2905 |
| 8.3966  | 33.0807 |

**Table S2**

Experimental weight fraction data for the systems composed of IL (1) +  $C_6H_5K_3O_7/C_6H_8O_7$  (2) +  $H_2O$  (3) at 25°C and pH 7.

| [P <sub>4444</sub> ]Cl |           | [N <sub>4444</sub> ]Cl |           |
|------------------------|-----------|------------------------|-----------|
| 100 $w_1$              | 100 $w_2$ | 100 $w_1$              | 100 $w_2$ |
| 86.4924                | 1.0557    | 50.1620                | 1.9141    |
| 63.9963                | 2.1215    | 45.2156                | 3.4470    |
| 54.1184                | 3.0299    | 42.0719                | 5.0582    |
| 48.8418                | 3.8526    | 38.4429                | 7.4342    |
| 45.1634                | 4.9749    | 36.2246                | 8.6956    |
| 41.6605                | 5.6622    | 34.5441                | 9.5152    |
| 38.3788                | 6.9352    | 32.5062                | 10.6393   |
| 35.4859                | 8.1447    | 29.6917                | 12.9078   |
| 33.2368                | 9.1887    | 27.6777                | 14.3710   |
| 32.0140                | 10.4540   | 25.3324                | 16.1640   |
| 31.2483                | 10.8314   | 23.7616                | 17.2831   |
| 30.5379                | 11.2235   | 21.2843                | 19.2403   |
| 29.8257                | 11.5870   | 19.5450                | 19.3433   |
| 28.8400                | 12.3574   | 18.0172                | 21.1155   |
| 28.2796                | 12.6258   | 15.9995                | 23.1501   |
| 27.6475                | 12.9362   | 14.0455                | 25.3000   |
| 27.0681                | 13.2758   | 12.9804                | 26.3039   |
| 25.1693                | 14.1107   | 11.6673                | 28.1300   |
| 24.0642                | 14.9879   | 11.0443                | 28.5202   |
| 23.5031                | 15.3220   | 10.0017                | 29.7699   |
| 22.8671                | 15.6276   | 9.0441                 | 30.9635   |
| 22.0932                | 16.1253   | 8.2642                 | 31.9726   |
| 21.4158                | 16.5200   | 7.8630                 | 32.5237   |
| 20.6174                | 17.1369   | 7.2713                 | 33.2358   |
| 19.8613                | 17.7528   | 6.8774                 | 33.9086   |

|         |         |        |         |
|---------|---------|--------|---------|
| 19.4211 | 17.9311 | 6.3816 | 34.5217 |
| 18.8651 | 18.2848 | 6.0857 | 34.9466 |
| 18.2412 | 18.8202 |        |         |
| 17.8484 | 19.0146 |        |         |
| 17.2806 | 19.4545 |        |         |
| 16.9682 | 19.6283 |        |         |
| 16.4548 | 20.0527 |        |         |
| 15.9250 | 20.4714 |        |         |
| 15.4629 | 20.8920 |        |         |
| 15.1644 | 21.0156 |        |         |
| 14.7427 | 21.3710 |        |         |
| 14.3337 | 21.7670 |        |         |
| 14.0974 | 21.8658 |        |         |
| 13.7232 | 22.1883 |        |         |
| 13.3256 | 22.5398 |        |         |
| 12.9924 | 22.8022 |        |         |
| 12.6610 | 23.0760 |        |         |
| 12.3382 | 23.3616 |        |         |
| 12.0179 | 23.6156 |        |         |
| 11.6960 | 23.8891 |        |         |
| 11.3895 | 24.2068 |        |         |
| 11.2217 | 24.2950 |        |         |
| 10.9611 | 24.5733 |        |         |
| 10.8120 | 24.6647 |        |         |
| 10.4943 | 25.0120 |        |         |
| 10.2971 | 25.1279 |        |         |
| 10.0704 | 25.3459 |        |         |
| 9.9706  | 25.3551 |        |         |
| 9.7907  | 25.5576 |        |         |
| 9.5933  | 25.7322 |        |         |

|        |         |
|--------|---------|
| 9.4068 | 25.9006 |
| 9.2592 | 26.0450 |
| 9.0738 | 26.2066 |
| 8.9031 | 26.3534 |
| 8.7424 | 26.4771 |
| 8.6448 | 26.5315 |
| 8.5041 | 26.6767 |
| 8.3424 | 26.8247 |
| 8.1868 | 26.9672 |
| 8.0522 | 27.1411 |
| 7.9174 | 27.2373 |
| 7.7751 | 27.3717 |
| 7.6558 | 27.5242 |
| 7.4726 | 27.7560 |
| 7.3972 | 27.7587 |
| 7.2689 | 27.8644 |
| 7.0996 | 28.0967 |
| 7.0320 | 28.1204 |
| 6.9784 | 28.1906 |
| 6.9154 | 28.2171 |
| 6.7833 | 28.3706 |
| 6.6517 | 28.5458 |
| 6.5472 | 28.6451 |
| 6.4414 | 28.7360 |
| 6.3508 | 28.8701 |
| 6.2583 | 28.9889 |
| 6.1654 | 29.0779 |
| 6.0494 | 29.2289 |
| 5.9604 | 29.3077 |
| 9.5933 | 25.7322 |

|        |         |
|--------|---------|
| 9.4068 | 25.9006 |
| 9.2592 | 26.0450 |
| 9.0738 | 26.2066 |
| 8.9031 | 26.3534 |
| 8.7424 | 26.4771 |
| 8.6448 | 26.5315 |
| 8.5041 | 26.6767 |
| 8.3424 | 26.8247 |
| 8.1868 | 26.9672 |
| 8.0522 | 27.1411 |
| 7.9174 | 27.2373 |
| 7.7751 | 27.3717 |
| 7.6558 | 27.5242 |
| 5.7127 | 30.3562 |
| 5.2826 | 31.1830 |
| 4.2756 | 32.3747 |
| 3.8831 | 33.5204 |
| 3.3983 | 34.9449 |
| 2.2193 | 36.3959 |
| 1.9091 | 39.8339 |
| 1.7341 | 43.2143 |
| 1.5590 | 45.9750 |
| 1.4739 | 48.4673 |



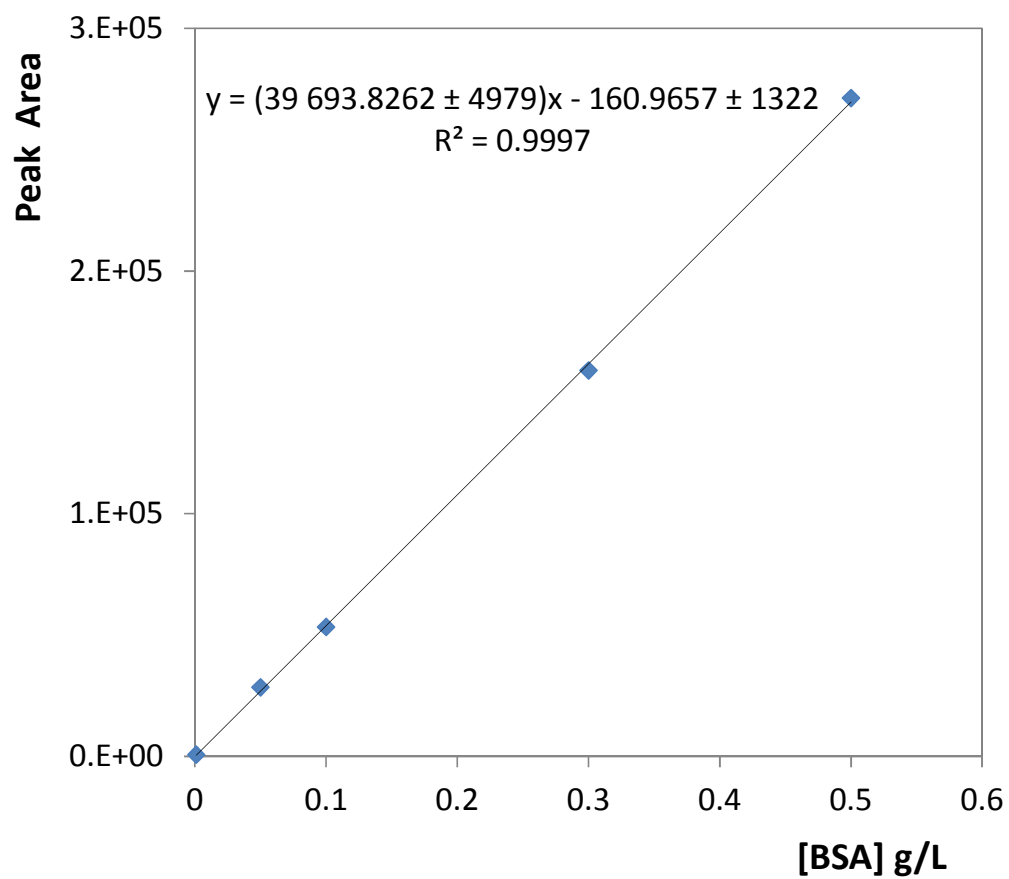

**Figure S1** - BSA calibration curve by SE-HPLC.

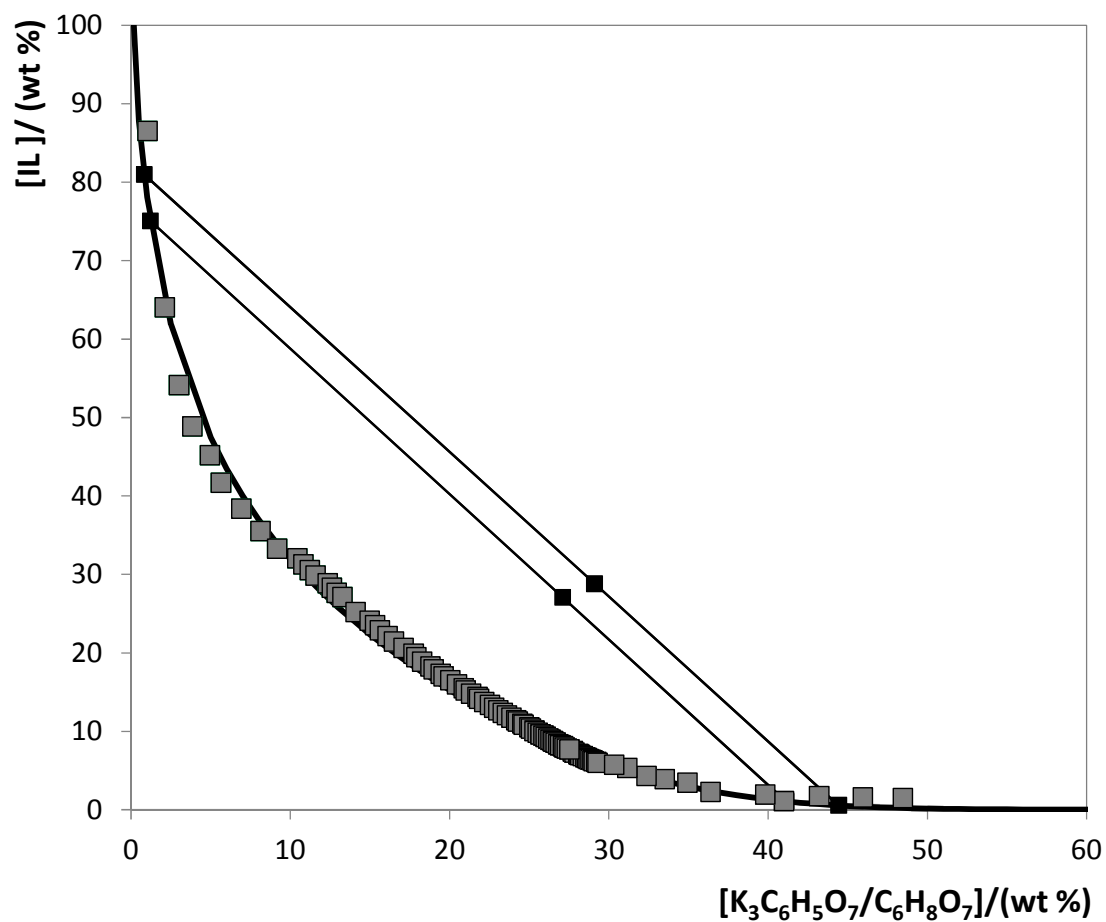

**Figure S2** - Phase diagram for the system composed of  $[P_{4444}]Cl + K_3C_6H_5O_7/C_6H_8O_7 + H_2O$  at  $25^\circ C$  and  $pH 7.0$ : binodal curve data (■); TL data (■); adjusted binodal data through Equation 1 (—).

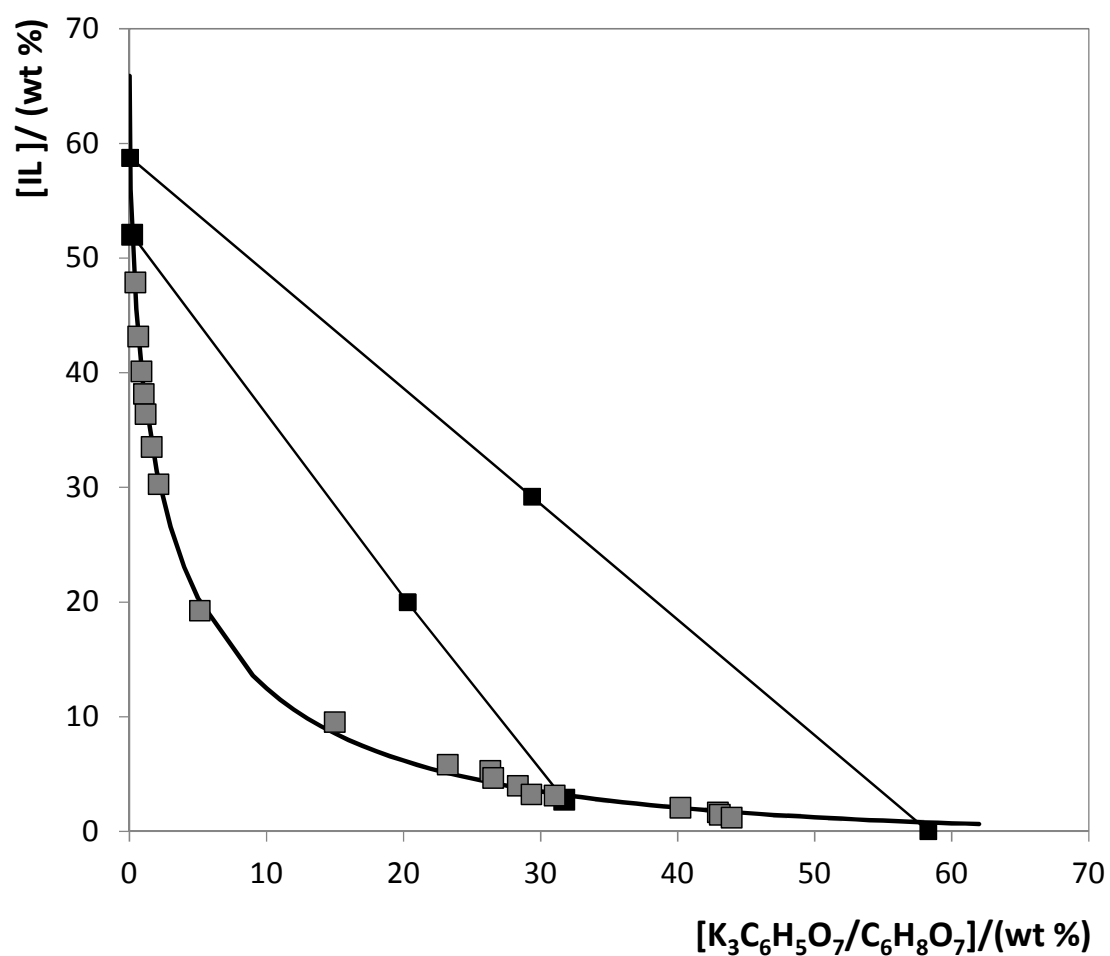

**Figure S3** - Phase diagram for the system composed of  $[P_{4444}]Br + K_3C_6H_5O_7/C_6H_8O_7 + H_2O$  at  $25^\circ C$  and  $pH 7.0$ : binodal curve data (■); TL data (■); adjusted binodal data through Equation 1 (—).

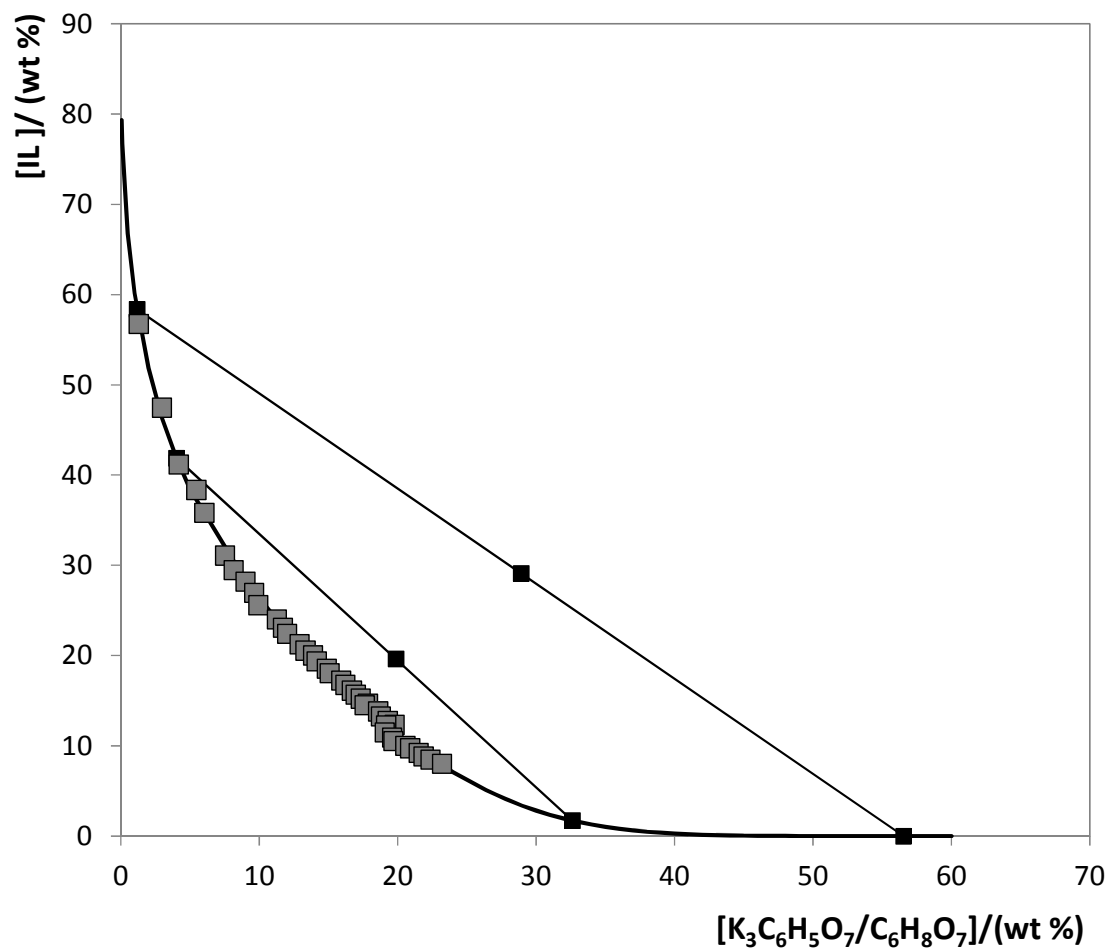

**Figure S4** - Phase diagram for the system composed of  $[P_{4441}][MeSO_4]$  +  $K_3C_6H_5O_7/C_6H_8O_7$  +  $H_2O$  at  $25^\circ C$  and pH 7.0: binodal curve data (■); TL data (■); adjusted binodal data through Equation 1 (—).

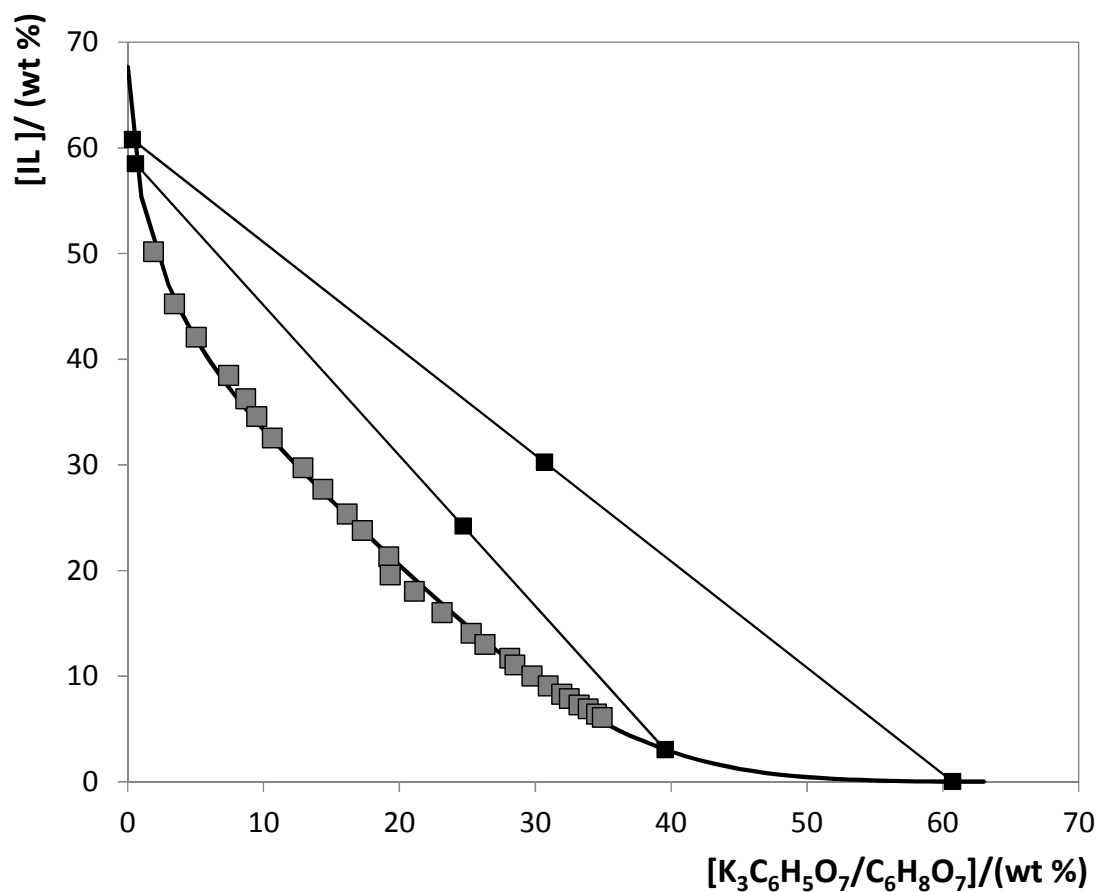

**Figure S5** - Phase diagram for the system composed of  $[N_{4444}]\text{Cl} + K_3C_6H_5O_7/C_6H_8O_7 + H_2O$  at  $25^\circ\text{C}$  and  $\text{pH } 7.0$ : binodal curve data (■); TL data (■); adjusted binodal data through Equation 1 (—).
